# Supplementary material
Source: PubMed Central journal article supplement (PMC2766293)

## LEGENDS TO SUPPLEMENT FIGURE

**Supplement Figure 1.** Immunoblot of retinal homogenates of wild-type, *Rpgrip1<sup>nmf247</sup>* (P16) and *Rpgrip1<sup>tm1Tili</sup>* (P17) mice with Ab#22. Ab#22 detects ~70kD band (arrow) in wild-type that was absent in both *Rpgrip1<sup>nmf247</sup>* and *Rpgrip1<sup>tm1Tili</sup>* mutant mice. In *Rpgrip1<sup>tm1Tili</sup>* mice, a strong RPGRIP1-immunopositive band was observed near 80kD (arrowhead), which was not found in wild-type or *Rpgrip1<sup>nmf247</sup>* mice. HSC70 serves as a loading control.

**FIGURES (300dpi, jpeg format)**

Supplementary Fig. 1.

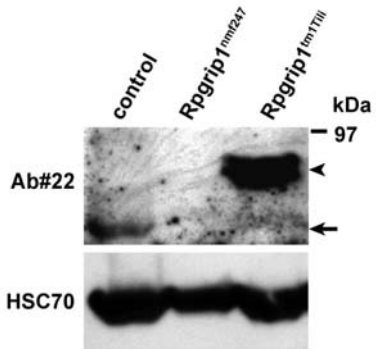

Supplement: ddp385_1.pdf [file ddp385_1.pdf]
